# Supplementary material for: Simultaneously assimilating multivariate data sets into the two-source evapotranspiration model by Bayesian approach: application to spring maize in an arid region of northwestern China
Source: Copernicus journal article supplement (doi:10.5194/gmd-7-1467-2014), 2014-07-17
Supplement: Supplementary file 1 [file gmd-7-1467-2014-supplement.zip]

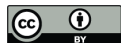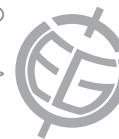

## *Supplement of*

# **Simultaneously assimilating multivariate data sets into the two-source evapotranspiration model by Bayesian approach: application to spring maize in an arid region of northwestern China**

**G. F. Zhu et al.**

*Correspondence to:* G. F. Zhu (zhugf@lzu.edu.cn)

- Supplement-Cover-Letter.pdf
- Supplement
  - Supplement 1.doc
  - Supplement 2.doc
  - Supplement 3.doc
