# Supplementary material for: Simultaneously assimilating multivariate data sets into the two-source evapotranspiration model by Bayesian approach: application to spring maize in an arid region of northwestern China
Source: Copernicus journal article supplement (doi:10.5194/gmd-7-1467-2014), 2014-07-17
Supplement: Supplementary file 1 [file Supplement 1.doc]

**Supplement 1**

**A.1 Global Sensitivity Analysis**

To identify the key parameters that being responsible for most of the variability of the model outputs, a global sensitivity analysis were performed. Following Saltelli et al. (2008), the first-order sensitivity index  and total effect sensitivity index  are given as:

(B1)

(B2)

whereis the partial variance of on output and given by ; is the total unconditional output variance; is the contribution to the total variance by the interactions between parameters  and ; denotes variation on all input parameters but;

**A.2 Monte Carlo Simulations**

The Monte Carlo method was used to calculate , and . The procedure are listed as below (Saltelli et al., 2010):

**Step 1:**

Generate two independent input parameter sampling matrices and with dimension , where is the sample size and is the number of input parameters;

**Step 2:**

Build another matrix () such that the *i*th column of is equal to the *i*th column of , and the remaining columns are from;

**Step 3:**

Calculate , and  using the following estimators:

where denotes the estimate; is the estimated value of model output; The matrices and are generated using the Latin Hypercube Sampling technique (Iman and Helton, 1988).

**A.3 Matlab Code for Global Sensitivity Analysis**

function [A,B]=LHSsample(N,d,interval)

%%%%%%%%%%%%%%%%%%%%%%%%%%%%%%%%%%%%%%%%%%%%%%%%

% Using the Latin Hypercube Sampling (LHS)technique (Iman and Helton, 1988)

% to generate matrices A and B

% Authors : Zhu Gaofeng

% Date : March 19, 2014

%%%%%%%%%%%%%%%%%%%%%%%%%%%%%%%%%%%%%%%%%%%%%%%%

% Description:

% N : number of sample

% d : dimension of parameter vector

% Interval : interval of prior distribution of paramter being d*2 matrix

% A : matrix A being N*d

% B : matrix B being N*d

interval=[interval;interval];

% Generates a LHS M1 containing N samples and 2*d dimension

M1=lhsdesign(N,2*d);

for j=1:size(M1,2)

int=interval(j,:);

for i=1:size(M1,1)

%transform to parameter space

M(i,j)=unifinv(M1(i,j),int(1),int(2));

end

end

A=M(:,1:d); % the first d columns were designed to matrix A

B=M(:,d+1:end); % the last d columns were designed to matrix B

%%%%%%%%%%%%%%%%%%%%%%%%%%%%%%%%%%%%%%%%%%%%%%% End of the sub-model

function LET=SWSA(rstmin,k1,k2,k3,b1,b2,Tamin,Tamax,KA,flag,F4,G,Rn,S,LAI,Ta,rho,D,SWC_2,delta,gamma,raa,ras,rac)

% calculate rss

thetas=0.45; % saturated water content at the 20 cm depth in [m3 m-3];

rss=exp(b1-b2*SWC_2./thetas);

% calculated rsc

F1=(eps+S)*(1055+k1)./(1055*(S+k1)); % S:short wave radiation W m-2

tao=(Tamax-k2)/(k2-Tamin);

numerator=(Ta-Tamin).*(Tamax-Ta).^tao;

denominator=(k2-Tamin).*(Tamax-k2).^tao;

F2=numerator./denominator;

F3=1-k3*D;

rsc=rstmin./(2*LAI.*F1.*F2.*F3.*F4);

% S-W model

% specific heat capacity of the dry air in kJ/kg/K;

Cp=1.013;

Ra=(delta+gamma).*raa;

Rs=(delta+gamma).*ras+gamma.*rss;

Rc=(delta+gamma).*rac+gamma.*rsc;

Cs=1./(1+Rs.*Ra./(Rc.*(Rs+Ra)));

Cc=1./(1+Rc.*Ra./(Rs.*(Rc+Ra)));

Rns=Rn.*exp(-KA.*LAI);

A=Rn-G;

As=Rns-G;

ETs=(delta.*A+(rho.*Cp.*D-delta.*ras.*(A-As))./(raa+ras))./(delta+gamma.*(1+rss./(raa+ras)));

ETc=(delta.*A+(rho.*Cp.*D-delta.*rac.*As)./(raa+rac))./(delta+gamma.*(1+rsc./(raa+rac)));

LE=Cs.*ETs;

LT=Cc.*ETc;

LET=LE+LT;

D0=D+(delta.*A-(delta+gamma).*LET).*raa./(rho.*Cp);

E=(delta.*As+rho.*Cp.*D0./ras)./(delta+gamma.*(1+rss./ras));

T=(delta.*(A-As)+rho.*Cp.*D0./rac)./(delta+gamma.*(1+rsc./rac));

%%%%%%%%%%%%%%%%%%%%%%%%%%%%%%%%%%%%%%%%%%%%%%% End of the sub-model

% Main Program

clc

clear

Nss=4000; % Sample numbers

% Prior parameter interval for rstmin, k1,k2,k3,b1,b2,Tamax,Tamin,KA

interval=[1 80

0 500

20 40

0 .1

4 15

0 8

0 5

40 45

.2 .8];

dem=size(interval,1); % dimension of parameter vector

% Generate matrices A and B using the LHS technique

[Am,Bm]=LHSsample(Nss,dem,interval);

% input meteorological data, Here we used the daily average data

data=[108.1539915 125.3973438 -3.675183507 0.871684028 13.78421875 64.39277778 844.5503472 17.07349201 26.71506701 2.832 256.97255 253.5320313];

% Variables

ET = data(1); % w m-2

Rn = data(2); % w m-2

G = data(3); % w m-2

u = data(4); % m s-1

Ta = data(5); % oC

RH = data(6)/100; % humidity

P = data(7)/10; % kPa

SWC_2= data(8)/100; % m3 m-3

SWC_r= data(9)/100; % m3 m-3

LAI = data(10); % m2 m-2;

hc = data(11)/100; % canopy height in m

z = 3; % reference height in m

S = data(12); % solar radiation

% calcualte wind speed at canopy height

z0 = 0.13*hc; % roughness lenght

d = 0.67*hc; % zero plane displacement

uh = u.*log((hc-d)./z0)./log((z-d)./z0);

% Calculate meteorologic varibles

lambda=2500.78-2.3601*Ta;

% saturaed vapour pressure in kPa

es=.6108*exp(17.27*Ta./(Ta+237.3));

% slope of pressure to temperature

delta=4098*es./(Ta+237.3).^2;

%air density

Rd=287/1000; % the gas constant in kJ/kg/K

ea=es.*RH;

D=es-ea;

rho=P./(Rd*(Ta+273.14).*(1+.378*ea./P));

%

Cp=1.013; %specific heat capacity of the dry air in kJ/kg/K;

epsilong=.622; %the ratio between the mplecular weight of water vapor and air

gamma=Cp*P./(lambda*epsilong);

% calculate raa

k=0.41; % von K¨¢rm¨¢n constant

% z0h=0.1*z0; % roughness length to the heat flux in [m];

n=2.5; % parameter in SW model

% LAI >4

raa_inf=log((z-d)./z0)./(k*k*(u+eps)).*(log((z-d)./(hc-d))+hc./(n*(hc-d)).*(exp(n*(1-(d+z0)./hc))-1));

% for bare surface

z0s=0.01;

ras0=log(z/z0s).*log((d+z0)/z0s)./(k*k*(u+eps));

raa_bare=(log(z/z0s).*log(z/z0s))./(k*k*(u+eps))-ras0; % bare surface

raa=.25*LAI.*raa_inf+.25*(4-LAI).*raa_bare;

% calculate ras

% LAI >4

ras_inf=log((z-d)./z0)./(k*k*(u+eps)).*hc./(n*(hc-d)).*(exp(n)-exp(n*(1-(d+z0)./hc)));

% for bare surface

z0s=0.01;

ras_bare=log(z/z0s).*log((d+z0)/z0s)./(k*k*(u+eps));

ras=.25*LAI.*ras_inf+.25*(4-LAI).*ras_bare;

% calculate rac

% method 1

rb=50;

rac=rb./(2*LAI);

% calcualte F4 in canopy resistance model

thetas=.45; % saturated SWC

thetacr=0.75*thetas;

thetaw=.11;

for i=1:length(SWC_r)

if SWC_r(i)>thetacr

F4(i,1)=1;

elseif SWC_r(i)>thetaw

F4(i,1)=(SWC_r(i)-thetaw)./(thetacr-thetaw);

else

F4(i,1)=eps;

end

end

% calculate the sensitivity index

sa1=0;

sb1=0;

ss1=zeros(1,dem);

st1=zeros(1,dem);

AB=zeros(1,dem);

for j=1:Nss

ETA=SWSA(Am(j,1),Am(j,2),Am(j,3),Am(j,4),Am(j,5),Am(j,6),Am(j,7),Am(j,8),Am(j,9),flag,F4,G,Rn,S,LAI,Ta,rho,D,SWC_2,delta,gamma,raa,ras,rac);

sa1=sa1+ETA;

sb1=sb1+ETA^2;

bfo(j,1)=sa1/j;

VY(j,1)=sb1/j-bfo(j,1)^2;

ETB=SWSA(Bm(j,1),Bm(j,2),Bm(j,3),Bm(j,4),Bm(j,5),Bm(j,6),Bm(j,7),Bm(j,8),Bm(j,9),flag,F4,G,Rn,S,LAI,Ta,rho,D,SWC_2,delta,gamma,raa,ras,rac);

for i=1:dem

AB=Am(j,:);

AB(i)=Bm(j,i);

ETAB=SWSA(AB(1),AB(2),AB(3),AB(4),AB(5),AB(6),AB(7),AB(8),AB(9),flag,F4,G,Rn,S,LAI,Ta,rho,D,SWC_2,delta,gamma,raa,ras,rac);

ss1(i)=ETB*(ETAB-ETA)+ss1(i);

Si(j,i)=ss1(i)/(j*VY(j,1));

st1(i)=st1(i)+(ETA-ETAB)^2;

ST(j,i)=st1(i)/(2*j*VY(j,1));

end

end

% Create figure

figure1 = figure('PaperType','a4letter','PaperSize',[20.98 29.68]);

% Create axes

axes1 = axes('Parent',figure1,'YScale','log','YMinorTick','on');

box('on');

hold('all');

% Create multiple lines using matrix input to semilogy

semilogy1 = semilogy(Si);

set(semilogy1(1),'DisplayName','{\itr}_{STmin}');

set(semilogy1(2),'DisplayName','{\itK}_1');

set(semilogy1(3),'DisplayName','{\itK}_2');

set(semilogy1(4),'DisplayName','{\itK}_3');

set(semilogy1(5),'DisplayName','{\itb}_1');

set(semilogy1(6),'DisplayName','{\itb}_2');

set(semilogy1(7),'DisplayName','{\itT}_{min}');

set(semilogy1(8),'DisplayName','{\itT}_{max}');

set(semilogy1(9),'DisplayName','{\itK}_A');

% Create xlabel

xlabel('Simulation');

% Create ylabel

ylabel('{\itS}_{i}');

% Create legend

legend1 = legend(axes1,'show');

set(legend1,'Position',[0.7141 0.3258 0.1121 0.2881]);

% Create textbox

annotation(figure1,'textbox','String',{'August'},'FontSize',14,...

'EdgeColor','none',...

'Position',[0.1387 0.8208 0.393 0.1009],...

'FitHeightToText',...

'on');

save Si

**A.4 First-order sensitivity indices**

**
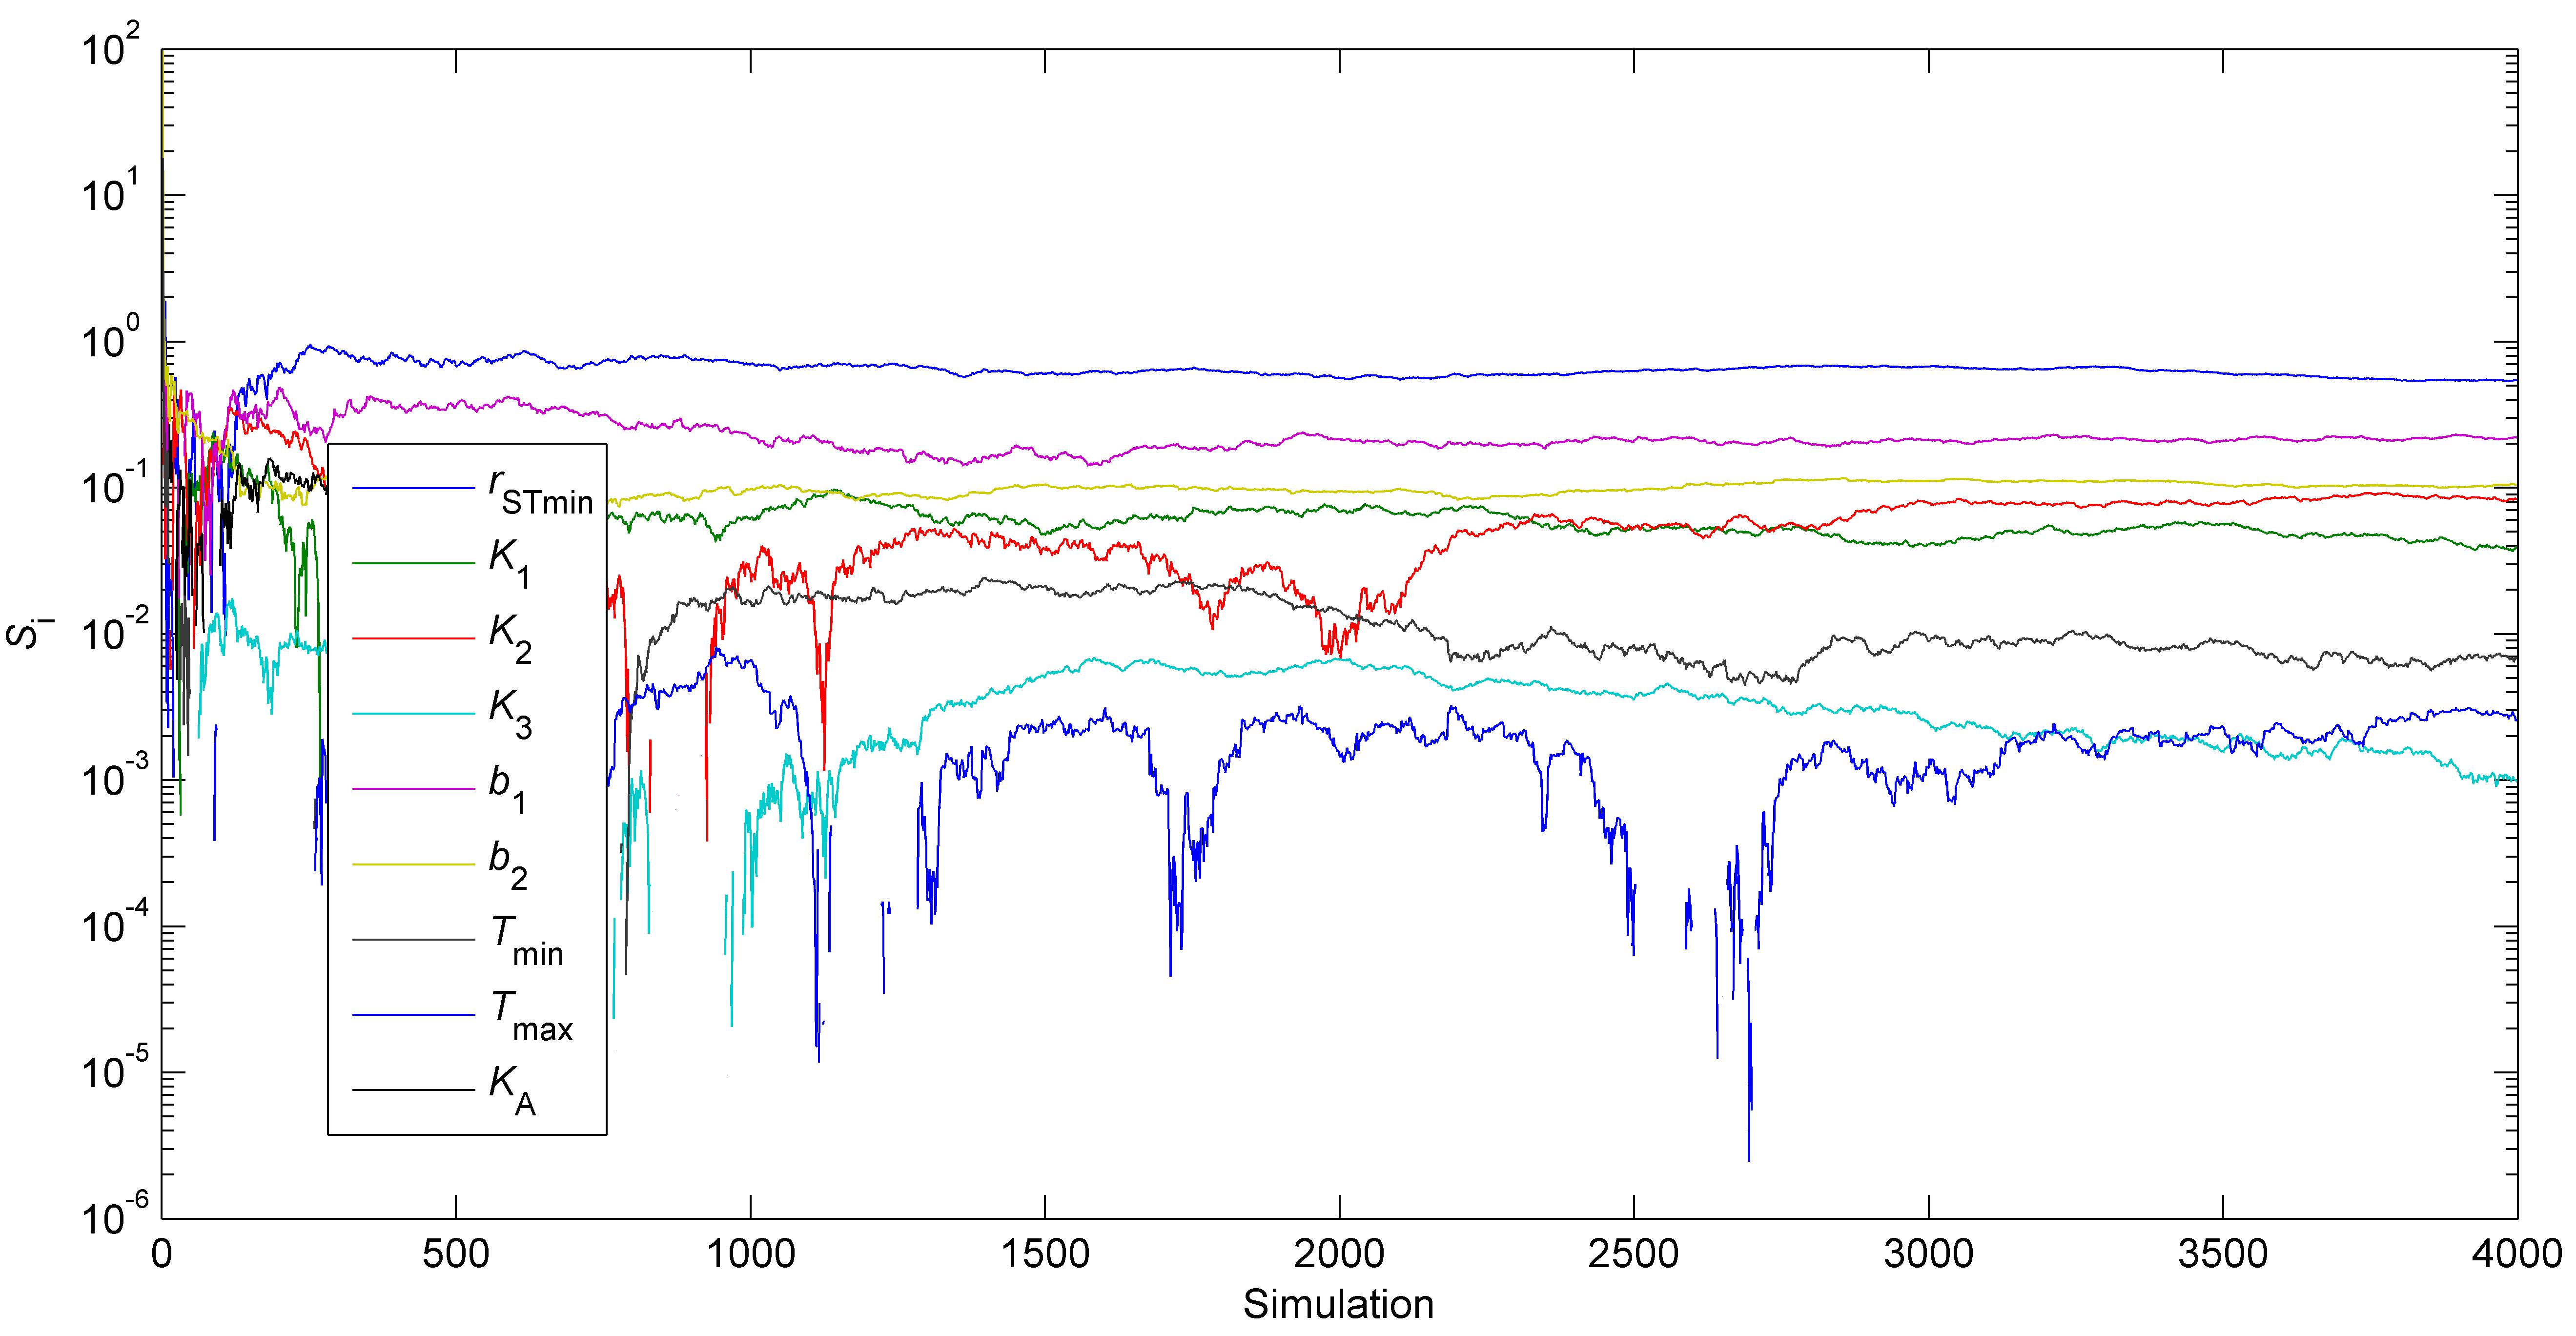
**

Fig. A1 The evolution of the first-order sensitivity indices.

Table A1 The first-order sensitivity index for different parameters

| Parameter | *S*i (%) | Order |
| --- | --- | --- |
| *r*STmin | 54.3 | 1 |
| *k*1 | 4.2 | 5 |
| *k*2 | 8.5 | 4 |
| *k*3 | 0 | 9 |
| *b*1 | 21.9 | 2 |
| *b*2 | 10.4 | 3 |
| *T*amin | 0.3 | 7 |
| *T*amax | 0.12 | 8 |
| *K*A | 2.84 | 6 |

From Fig. A1 and Table A1, we can see that the most sensitive parameters in the S-W model was *r*STmin, and followed by *b*1 , *b*2, *k*2 and *k*1. Other parameters with *S*i less than 5% had almost no effect on the variability in model output. In addition, we thought that some parameter such as *K*A (the extinction coefficient of light attenuation) has obviously physical meaning and should be measured directly on *site* (see Sauer et al., 2007). Thus, in our study, only six parameters were selected to be estimated in order to avoid equifinality or over-parameterization.

Overall, the key parameters in the S-W model are *r*STmin , *b*1 and *b*2 with the values of *S*i larger than 10%. Thus, proper estimations of these parameters have great influences in reducing the uncertainty on model simulation.

**A.5 Prior Uncertainty Quantification**

To derive from that the prior predictive uncertainty, 4000 parameter vectors were sampled from the prior uniform distribution using Latin Hypercube Sampling (LHS) method. The results indicated that the both simulated daily (ET; mm d-1) and soil evaporation (*E*; mm day-1) showed larger uncertainties (Fig. C2). Thus, there is an urgent need to optimize the parameters based on available datasets.


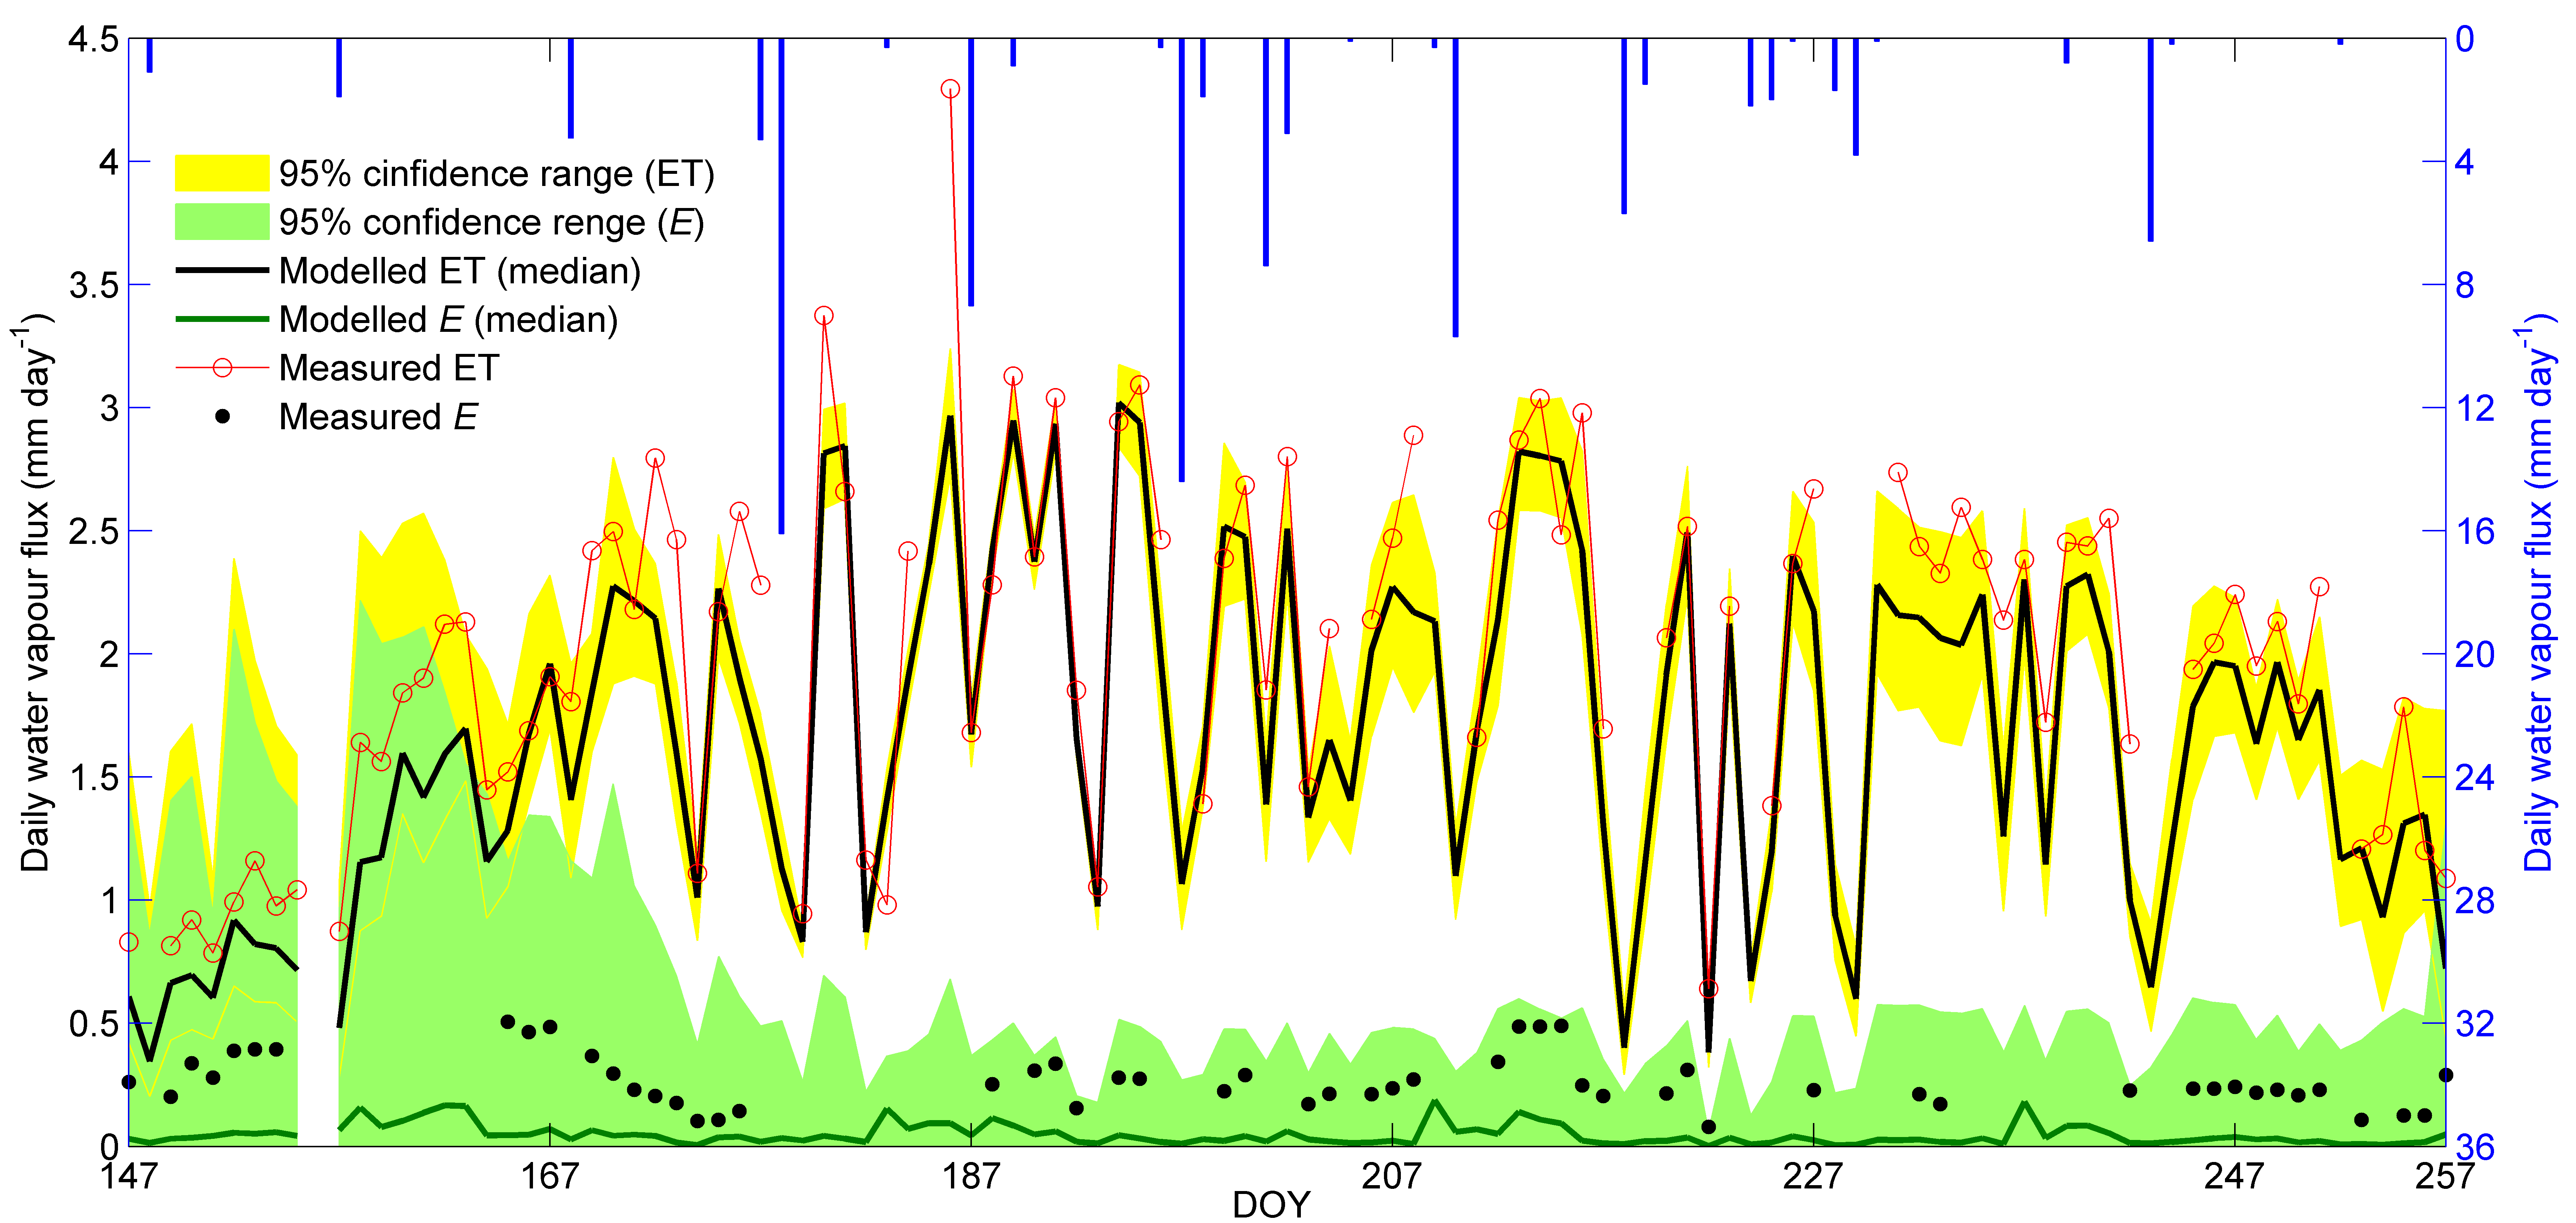


Fig. A2 Seasonal variation in daily evapotranspiration (ET; mm d-1) and soil evaporation (*E*; mm day-1) measured by the EC system and modeled by the S-W model using the prior distribution of parameters. Gap in the time series is caused either by the absence of flux measurements or missing ancillary data.

**Reference:**

Iman, R.L., Helton, J.C.: An investigation of uncertainty and sensitivity analysis techniques for computer models. Risk Analysis 8(1): 71-90, 1988.

Saltelli, A., Annoni, P., Azzini, I., Campolongo, F., Ratto, M., Tarantola, S.: Variance based sensitivity analysis of model output. Design and estimator for the total sensitivity index. Comput. Phys. Commun. 181, 259-270, 2010.

Saltelli, A., Ratto, M., Andres, T., Campolongo, F., Cariboni, J., Gatelli, D., Saisana, M., Tarantola, S.: Global Sensitivity Analysis: The Primer. John Wiley & Sons, Ltd. 2008.

Sauer, T.J., Singer J.W., Prueger, J.H., DeSutter, T.M., Hatfield, J.L.: Radiation balance and evaporation partitioning in a narrow-row soybean canopy. Agric. For. Meteor., 145, 206-214, 2007.
