# Supplementary material for: Simultaneously assimilating multivariate data sets into the two-source evapotranspiration model by Bayesian approach: application to spring maize in an arid region of northwestern China
Source: Copernicus journal article supplement (doi:10.5194/gmd-7-1467-2014), 2014-07-17
Supplement: Supplementary file 3 [file Supplement 3.doc]

**Supplement 3**

**C.1 Convergence of MCMC**

where is the number M-H parallel chains; is the running length of M-H algorithm; is the *i*th component of the parameter vector ; and denotes the between and within-run variances; and is the Gelman-Rubin (G-R) diagnostic of convergence of MCMC (Gelman and Rubin, 1992).

The evolution of GR diagnostic of convergence of MCMC was shown in Fig. C1. We can see that the GR values for all parameters tended to be less than 1.1 after 5000 iteration.


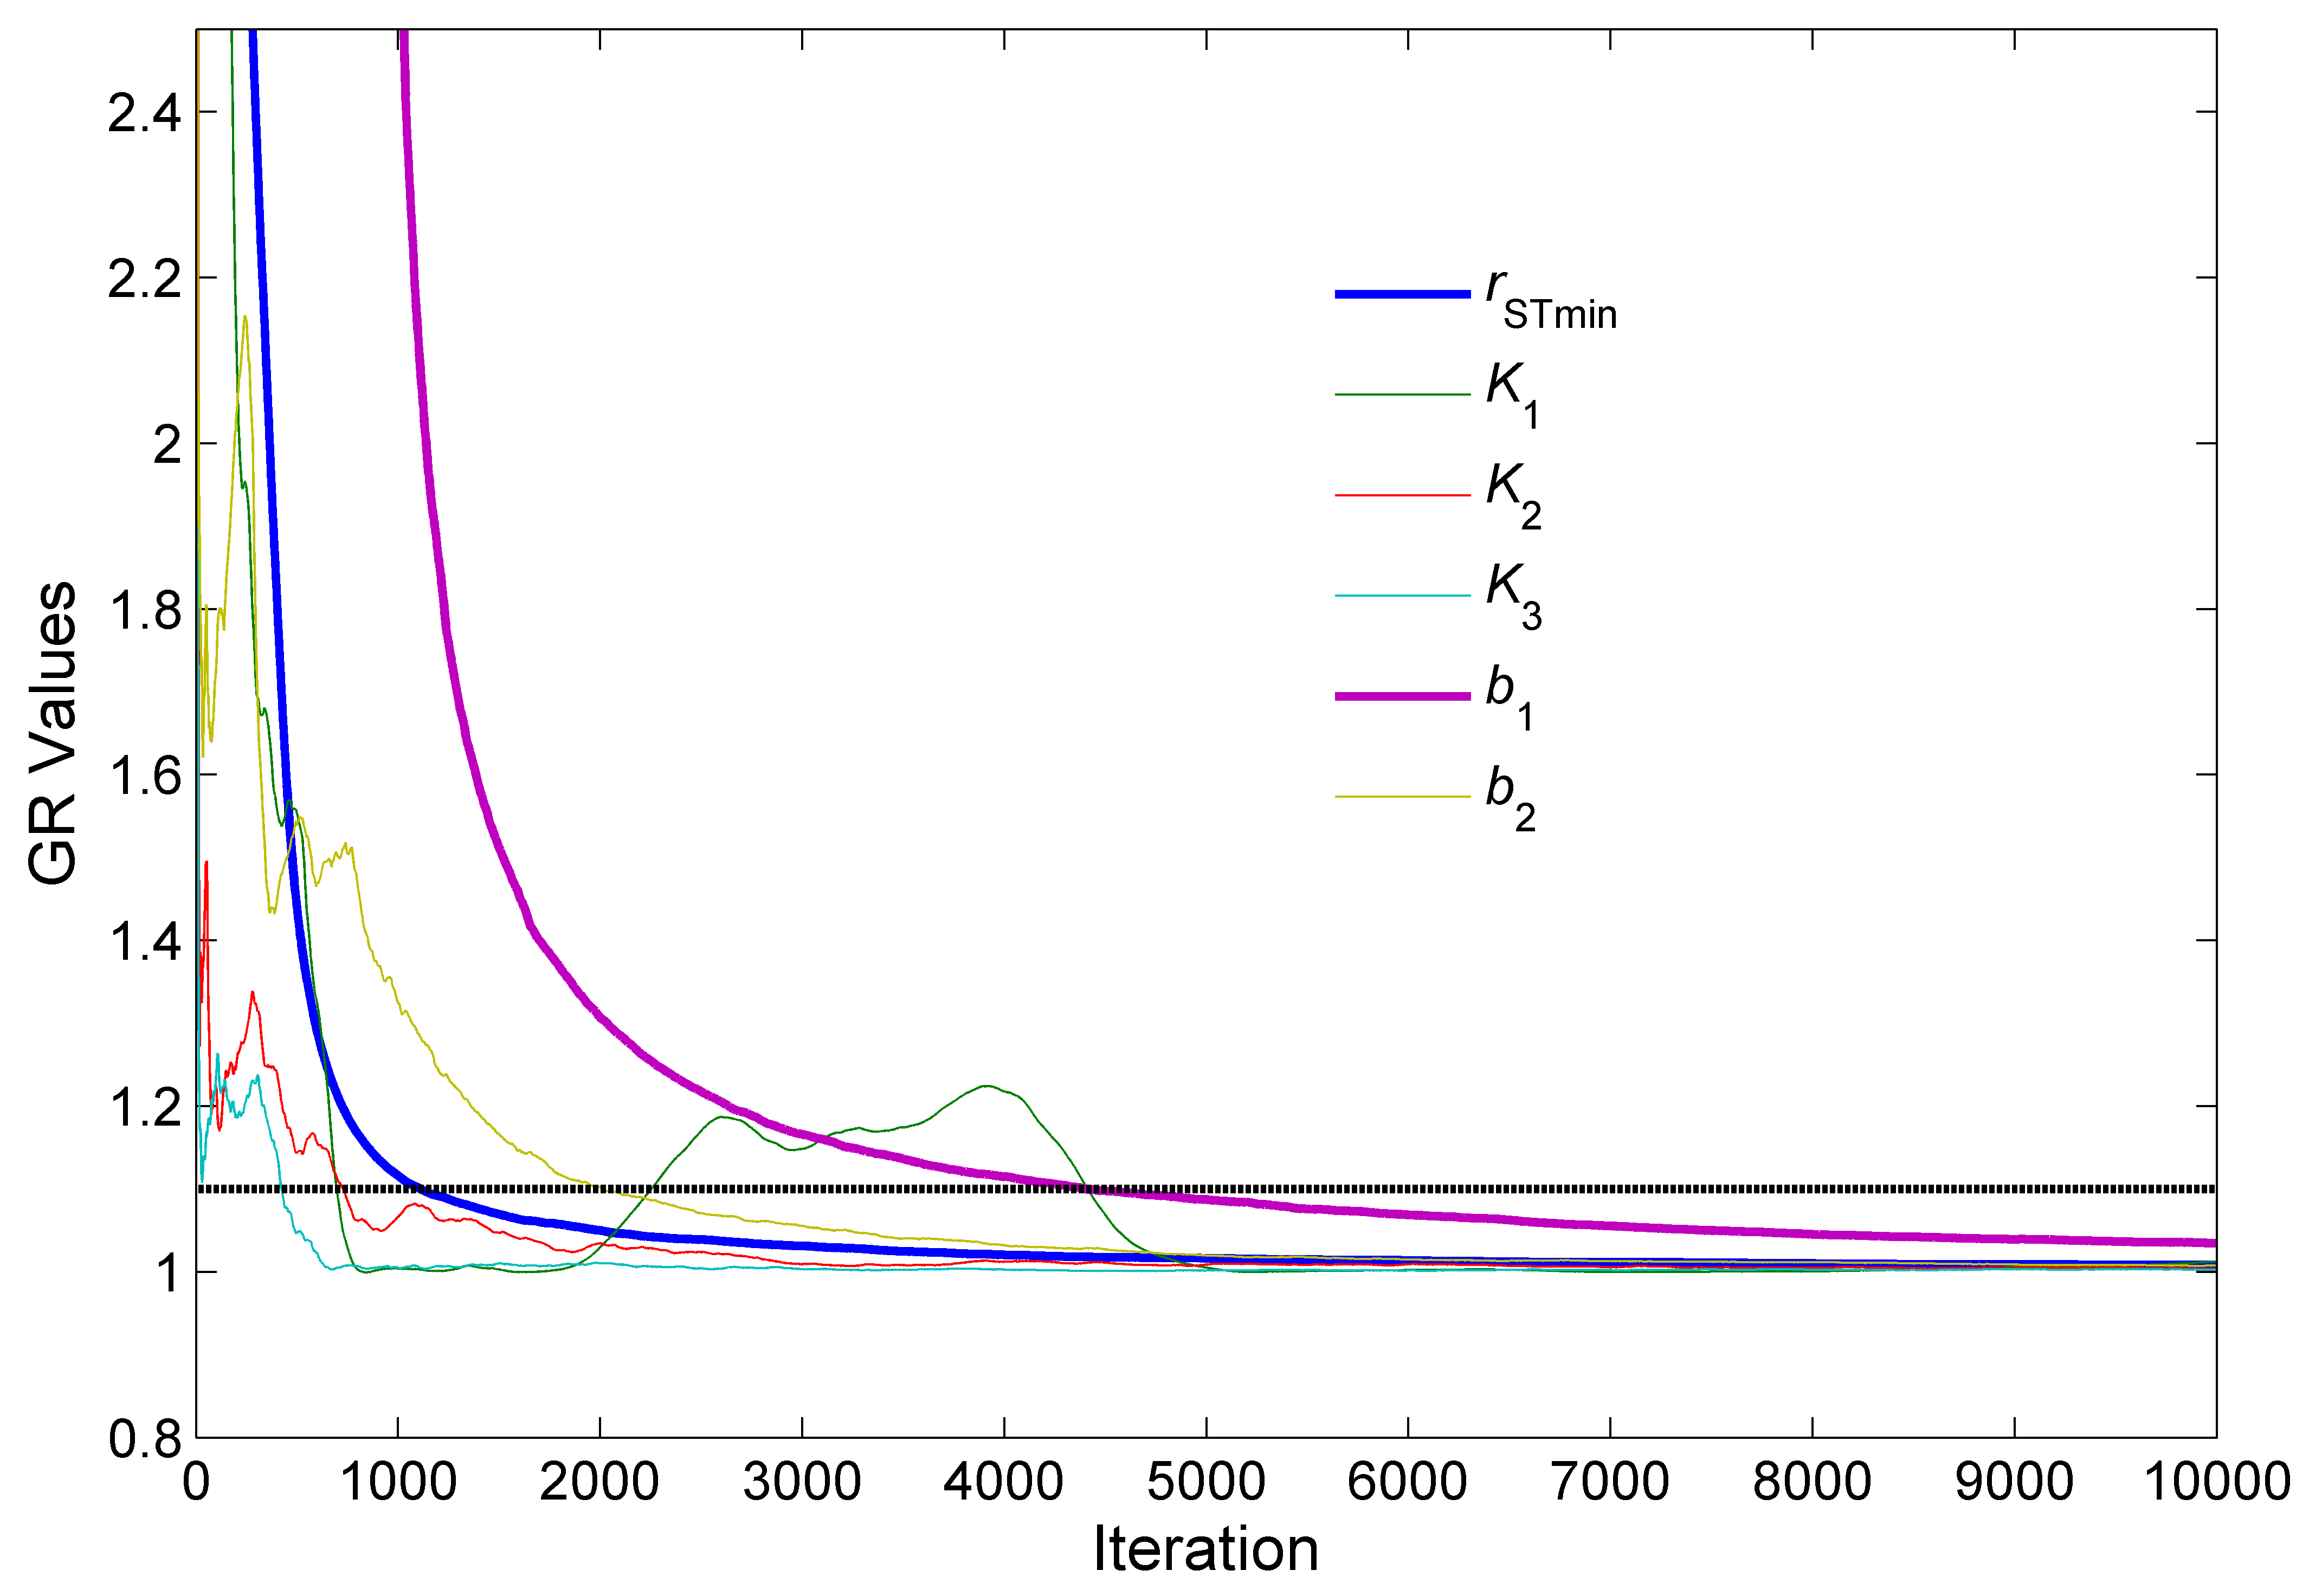


Fig. C1 The evolution of GR diagnostic of convergence of MCMC. Four parallel chains with different initial values were used to calculate GR values.

**B.2 Matlab Code**

clc

clear

load Chain

% Chain is the matrix than contain N running length, K parallel chains

% it is a N*K matrix for parameter ci

[N,K]=size(Chain);

for k=1:K

ss=0;

for n=1:N

ss=ss+Chain(n,k);

cwb(n,k)=ss/n; %calculate c.,k

end

end

for n=1:N

st=0;

for k=1:K

st=st+cwb(n,k);

end

cst(n)=st/K; % calculate c.,.

end

for n=1:N

sb=0;

for k=1:K

sb=sb+(cwb(n,k)-cst(n))^2;

end

B(n)=n*sb/(K-1); % calculated B

end

for k=1:K

sw=0;

for n=1:N

sw=sw+(Chain(n,k)-cwb(n,k))^2;

swc(n,k)=sw/(n-1);

end

end

for n=1:N

s1=0;

for k=1:K

s1=s1+swc(n,k);

end

W(n,1)=s1/K; % calculated W

end

for n=1:N

GR(n,1)=sqrt((W(n)*(n-1)/n+B(n)/n)/W(n));

end
